# Supplementary material
Source: publisher figshare collection journal article supplement (https://diabetesjournals.figshare.com/ndownloader/files/22462055)
Supplement: Supplementary file 1 [file 22462055]

## Sheet: README
Supplementary Table 1: Results of eating habit questionnaire
For full details of questionnaire design and data collection see Ahadi, S., Zhou, W., Schüssler-Fiorenza Rose, S.M. et al. Personal aging markers and ageotypes revealed by deep longitudinal profiling. Nat Med 26, 83–90 (2020). https://doi.org/10.1038/s41591-019-0719-5

## Sheet: QUESTIONS
Dietary Component	Less than 1	1-2	2-3	4-5	6 or more
slices of bread/rolls	1	2	3	4	5			How much do you usually eat in a day?
biscuits (including chocolate biscuits)	1	2	3	4	5
cakes/scones/sweet pies/pastries	1	2	3	4	5
Dietary Component	6+ times per day	4-5 times per day	2-3 times per day	once per day	5-6 times per week	2-4 times per week	once per week	1-3 times per month	less than once per month
breakfast_cereal	1	2	3	4	5	6	7	8	9		How often do you eat these foods?
fresh_fruit	1	2	3	4	5	6	7	8	9
cooked_green_vegetables	1	2	3	4	5	6	7	8	9
cooked_root_vegetables	1	2	3	4	5	6	7	8	9
raw_vegetables_or_salad	1	2	3	4	5	6	7	8	9
chips	1	2	3	4	5	6	7	8	9
potatoes_pasta_rice	1	2	3	4	5	6	7	8	9
meat	1	2	3	4	5	6	7	8	9
meat_products	1	2	3	4	5	6	7	8	9
poultry	1	2	3	4	5	6	7	8	9
white_fish	1	2	3	4	5	6	7	8	9
oil_rich_fish	1	2	3	4	5	6	7	8	9
cheese	1	2	3	4	5	6	7	8	9
beans_or_pulses	1	2	3	4	5	6	7	8	9
sweets_chocolates	1	2	3	4	5	6	7	8	9
ice_cream	1	2	3	4	5	6	7	8	9
crisps_savoury_snacks	1	2	3	4	5	6	7	8	9
fruit_juice	1	2	3	4	5	6	7	8	9
soft_drinks	1	2	3	4	5	6	7	8	9
cakes_scones_sweet_pies	1	2	3	4	5	6	7	8	9
pastries	1	2	3	4	5	6	7	8	9
biscuits	1	2	3	4	5	6	7	8	9

## Sheet: RAW DATA
sample number	rand_subject_id	slices of bread/rolls	biscuits (including chocolate biscuits)	cakes/scones/sweet pies/pastries	breakfast_cereal	fresh_fruit	cooked_green_vegetables	cooked_root_vegetables	raw_vegetables_or_salad	chips	potatoes_pasta_rice	meat	meat_products	poultry	white_fish	oil_rich_fish	cheese	beans_or_pulses	sweets_chocolates	ice_cream	crisps_savoury_snacks	fruit_juice	soft_drinks	cakes_scones_sweet_pies	pastries	biscuits	IL-17/IL-22 Activity Group
1	ZOZOW1T	NA	NA	NA	NA	NA	NA	NA	NA	NA	NA	NA	NA	NA	NA	NA	NA	NA	NA	NA	NA	NA	NA	NA	NA	NA	Low Activity
2	ZOZOW1T	2	1	1	5	4	8	6	4	5	3	6	8	3	5	6	3	8	9	8	7	8	9	7	8	7	Low Activity
3	ZOZOW1T	NA	NA	NA	NA	NA	NA	NA	NA	NA	NA	NA	NA	NA	NA	NA	NA	NA	NA	NA	NA	NA	NA	NA	NA	NA	Low Activity
4	ZOZOW1T	NA	NA	NA	NA	NA	NA	NA	NA	NA	NA	NA	NA	NA	NA	NA	NA	NA	NA	NA	NA	NA	NA	NA	NA	NA	Low Activity
5	ZOZOW1T	3	1	1	6	3	9	7	6	6	5	3	4	4	6	7	4	8	9	8	7	9	9	7	8	7	Low Activity
6	ZOZOW1T	NA	NA	NA	NA	NA	NA	NA	NA	NA	NA	NA	NA	NA	NA	NA	NA	NA	NA	NA	NA	NA	NA	NA	NA	NA	Low Activity
7	ZOZOW1T	2	1	1	6	3	8	7	5	4	4	6	6	3	5	6	4	8	9	8	7	9	9	7	8	7	Low Activity
8	ZOZOW1T	3	1	1	6	3	9	8	5	6	4	6	8	3	5	7	4	8	9	8	7	9	NA	7	8	7	Low Activity
9	ZOZOW1T	2	NA	1	6	3	8	6	4	NA	4	6	6	5	5	7	4	7	9	8	7	9	9	7	8	7	Low Activity
10	ZOBX723	2	2	1	4	5	4	2	6	6	6	6	NA	5	7	6	4	5	4	8	5	8	9	5	7	7	Indeterminate
11	ZOBX723	3	1	1	4	4	4	4	6	7	6	5	4	5	7	6	4	5	5	7	7	9	9	6	6	5	Indeterminate
12	ZOBX723	2	3	1	4	4	5	4	6	6	7	6	6	5	7	8	3	6	5	7	6	8	9	6	7	3	Indeterminate
13	ZOBX723	2	3	1	4	5	6	4	6	6	7	6	5	5	7	8	3	6	5	8	6	9	9	6	6	3	Indeterminate
14	ZOBX723	2	2	1	4	4	5	5	6	6	5	6	7	5	7	6	4	6	5	7	7	8	9	4	5	7	Indeterminate
15	ZOBX723	1	NA	2	4	4	4	5	6	6	6	6	6	5	7	8	3	5	4	7	7	8	9	5	5	4	Indeterminate
16	ZO94RDZ	1	1	1	8	2	3	3	4	6	8	8	8	7	5	5	8	5	8	8	7	8	8	7	8	7	Indeterminate
17	ZO94RDZ	NA	NA	NA	NA	NA	NA	NA	NA	NA	NA	NA	NA	NA	NA	NA	NA	NA	NA	NA	NA	NA	NA	NA	NA	NA	Indeterminate
18	ZO5QFNX	1	1	1	8	4	4	3	4	2	4	4	4	3	7	8	3	3	4	7	2	9	9	7	8	7	Indeterminate
19	ZNQOVZV	2	1	1	9	5	5	4	7	6	6	6	8	5	6	8	6	3	7	8	7	9	4	6	7	6	Low Activity
20	ZNQOVZV	2	1	1	9	4	4	5	6	6	6	5	9	5	6	7	5	5	7	8	5	9	5	6	7	6	Low Activity
21	ZNQOVZV	3	1	1	9	4	7	5	5	6	6	6	8	5	7	8	6	6	6	8	6	7	5	7	8	7	Low Activity
22	ZNQOVZV	3	1	1	1	5	5	6	6	7	7	7	9	6	7	8	6	7	7	8	7	8	5	5	7	7	Low Activity
23	ZNQOVZV	2	1	1	NA	3	4	6	4	6	6	5	9	5	7	8	6	5	6	8	7	9	6	7	8	7	Low Activity
24	ZNQOVZV	NA	NA	NA	NA	NA	NA	NA	NA	NA	NA	NA	NA	NA	NA	NA	NA	NA	NA	NA	NA	NA	NA	NA	NA	NA	Low Activity
25	ZNED4XZ	3	1	1	9	3	3	5	2	4	9	9	9	4	3	3	3	3	4	7	4	9	9	7	8	7	High Activity
26	ZNED4XZ	3	1	1	9	5	3	2	2	7	6	9	9	5	5	4	3	4	6	7	7	8	9	6	8	7	High Activity
27	ZNED4XZ	3	2	2	9	5	3	3	2	6	8	8	8	5	3	3	2	3	6	6	6	7	9	6	8	5	High Activity
28	ZNED4XZ	3	1	2	9	3	3	6	3	5	6	8	9	6	5	5	2	4	6	6	2	8	9	7	8	7	High Activity
29	ZNED4XZ	3	1	1	9	3	3	5	3	7	9	9	9	4	5	4	3	4	5	7	4	9	9	7	8	6	High Activity
30	ZNED4XZ	3	1	1	9	3	3	2	3	7	6	9	9	5	5	6	4	5	4	7	7	8	9	6	8	6	High Activity
31	ZNED4XZ	3	1	2	9	3	4	5	3	7	7	6	9	5	4	5	2	3	4	5	4	9	9	7	6	7	High Activity
32	ZNED4XZ	3	1	1	9	3	3	2	3	7	6	9	9	5	5	3	2	3	4	6	7	6	9	7	8	6	High Activity
33	ZNDMXI3	2	1	1	9	6	1	2	4	6	8	3	3	2	7	8	8	8	7	7	4	8	9	6	8	NA	Indeterminate
34	ZNDMXI3	3	1	1	9	6	5	4	6	3	7	6	8	5	6	7	7	7	5	6	2	6	6	5	6	6	Indeterminate
35	ZNDMXI3	3	1	1	9	6	6	5	7	3	6	5	6	4	6	7	8	7	7	8	4	7	6	7	7	7	Indeterminate
36	ZNDMXI3	3	1	2	9	4	4	3	4	1	8	3	4	3	7	8	8	8	3	8	1	8	4	5	7	7	Indeterminate
37	ZN9YTFN	4	5	3	7	6	7	5	6	3	6	8	9	8	4	6	3	5	5	4	5	9	9	5	6	2	Indeterminate
38	ZN9YTFN	2	2	4	8	5	7	7	5	6	6	9	NA	NA	NA	6	4	5	4	7	7	9	9	2	7	6	Indeterminate
39	ZN9YTFN	4	4	3	8	4	4	6	8	6	7	8	9	8	6	6	2	4	3	2	5	9	9	6	7	3	Indeterminate
40	ZN9YTFN	2	1	2	9	6	7	6	3	6	3	8	8	8	7	8	2	3	4	8	6	9	9	6	6	7	Indeterminate
41	ZN9YTFN	4	1	2	6	5	7	7	6	6	6	8	8	8	8	6	4	7	6	8	7	9	9	7	7	7	Indeterminate
42	ZN9YTFN	2	1	3	9	3	3	2	5	6	6	8	7	8	7	8	3	7	5	8	5	9	9	7	6	7	Indeterminate
43	ZN9YTFN	2	1	3	2	3	3	3	2	4	3	7	7	7	3	2	1	2	1	5	6	7	8	5	5	6	Indeterminate
44	ZN9YTFN	2	4	2	8	5	7	5	5	6	7	9	9	8	7	8	4	6	4	7	5	NA	9	6	6	3	Indeterminate
45	ZN9YTFN	3	1	4	9	6	7	8	6	6	6	8	6	8	8	7	4	7	6	7	6	NA	NA	6	8	NA	Indeterminate
46	ZN9YTFN	2	1	4	9	6	6	7	5	6	6	8	8	8	7	8	4	6	8	8	5	9	9	6	7	7	Indeterminate
47	ZN3TBJM	3	NA	NA	7	4	4	3	4	7	NA	4	4	3	5	6	4	NA	4	8	6	9	9	7	8	7	Indeterminate
48	ZN3TBJM	2	NA	NA	4	3	4	4	5	7	4	6	7	3	5	7	6	6	5	6	5	7	8	6	7	6	Indeterminate
49	ZN3TBJM	2	1	1	6	3	6	6	4	3	7	7	7	3	6	7	8	7	4	8	2	9	9	7	8	7	Indeterminate
50	ZN3TBJM	2	1	1	4	4	4	3	4	7	4	7	7	4	5	5	3	5	4	6	5	7	8	6	7	6	Indeterminate
51	ZN3TBJM	2	1	1	8	4	6	5	4	6	8	4	4	3	7	8	5	6	4	7	5	8	8	6	7	6	Indeterminate
52	ZN3TBJM	3	1	1	7	3	4	4	5	7	7	7	4	5	7	7	6	6	4	8	5	9	9	7	8	NA	Indeterminate
53	ZN3TBJM	2	NA	NA	8	4	7	6	4	7	8	NA	7	3	7	8	7	7	4	8	7	9	9	7	8	7	Indeterminate
54	ZN3TBJM	2	2	NA	8	4	6	5	4	7	9	7	NA	3	6	7	3	5	4	8	2	9	9	7	8	7	Indeterminate
55	ZN3TBJM	2	NA	NA	8	4	6	5	5	7	7	7	6	4	6	7	5	6	4	8	6	9	9	6	7	6	Indeterminate
56	ZN0JE53	1	1	1	9	6	6	5	6	7	6	4	4	5	7	8	6	7	5	8	6	9	9	5	7	7	Indeterminate
57	ZN0JE53	1	1	1	8	5	4	3	3	7	6	4	8	5	7	8	6	6	5	7	7	9	9	6	7	7	Indeterminate
58	ZN0JE53	1	1	1	8	4	5	4	5	7	8	6	7	5	7	8	NA	5	7	5	7	9	9	6	7	7	Indeterminate
59	ZN0JE53	1	1	2	7	4	5	5	7	7	6	4	8	5	7	7	7	6	4	5	7	9	9	6	7	7	Indeterminate
60	ZN0JE53	1	1	1	8	4	4	3	6	7	6	6	8	3	6	7	7	7	6	5	7	9	9	6	8	7	Indeterminate
61	ZN0JE53	1	1	2	8	4	4	6	7	7	7	NA	3	5	7	8	6	7	5	6	7	9	9	7	7	6	Indeterminate
62	ZN0JE53	1	1	1	8	5	6	5	7	7	6	4	8	5	7	7	7	6	4	6	7	9	9	5	8	7	Indeterminate
63	ZN0JE53	2	1	1	6	4	5	5	6	6	5	4	7	5	6	7	6	6	5	4	NA	8	9	7	8	7	Indeterminate
64	ZN0JE53	1	1	2	9	6	NA	3	6	7	6	4	7	4	7	8	6	6	5	8	7	9	9	4	8	7	Indeterminate
65	ZN0JE53	1	1	2	7	4	4	4	7	7	6	6	8	5	6	7	7	6	5	7	7	9	9	3	7	7	Indeterminate
66	ZMGT937	2	1	2	7	6	6	6	7	7	6	7	7	6	8	9	6	6	7	8	4	9	9	5	8	7	Low Activity
67	ZMGT937	3	1	1	9	6	6	5	8	6	6	7	8	6	8	9	6	7	8	7	5	9	9	6	8	6	Low Activity
68	ZMGT937	2	1	1	9	6	6	5	6	5	6	7	7	6	8	9	5	6	7	8	4	9	9	5	6	7	Low Activity
69	ZMGT937	2	2	1	8	4	4	3	5	5	5	7	7	7	8	9	5	4	6	6	3	9	8	4	8	5	Low Activity
70	ZMGT937	3	1	1	8	4	4	3	6	7	4	6	6	8	8	9	5	5	8	7	4	7	9	6	7	5	Low Activity
71	ZMGT937	3	1	1	NA	5	5	NA	NA	6	5	6	6	5	8	9	2	6	6	7	3	9	8	5	6	5	Low Activity
72	ZMGT937	3	3	1	6	3	7	5	6	6	4	6	8	5	8	9	3	6	7	6	4	9	7	6	6	5	Low Activity
73	ZMGT937	3	2	1	8	5	5	6	7	6	7	6	9	5	8	9	4	6	6	6	6	9	9	5	6	5	Low Activity
74	ZMBVNFM	1	1	2	4	1	5	6	5	7	6	6	9	6	7	6	7	8	4	7	6	4	9	6	5	NA	Indeterminate
75	ZMBVNFM	1	1	1	4	1	6	7	4	6	7	6	9	6	7	6	7	8	4	7	7	4	9	6	5	6	Indeterminate
76	ZMBVNFM	1	1	2	4	1	4	5	4	7	7	4	9	5	6	7	7	5	1	8	7	3	9	7	3	7	Indeterminate
77	ZMBVNFM	1	1	1	4	2	4	6	4	7	7	4	9	5	7	8	8	8	1	7	7	4	9	7	4	7	Indeterminate
78	ZMBH10Z	3	1	2	6	5	6	6	6	5	6	5	5	4	6	7	5	5	6	5	5	8	8	5	6	6	Indeterminate
79	ZMBH10Z	2	2	2	7	5	6	4	6	5	7	6	6	4	6	7	5	6	6	6	4	7	7	4	5	4	Indeterminate
80	ZMBH10Z	3	1	1	6	3	4	5	4	5	6	4	4	3	6	7	3	6	4	6	3	7	7	5	6	7	Indeterminate
81	ZMBH10Z	3	1	2	6	5	6	5	5	5	6	5	5	4	6	7	5	5	5	6	5	NA	7	4	5	6	Indeterminate
82	ZMBH10Z	3	2	2	7	3	6	5	4	4	6	6	6	4	7	8	5	6	4	7	1	6	7	4	6	7	Indeterminate
83	ZM8YXDM	3	2	2	9	6	6	6	7	7	5	5	5	4	6	7	7	6	4	6	7	8	9	3	7	6	Indeterminate
84	ZM8YXDM	3	1	1	6	5	3	4	3	6	6	5	7	4	6	5	4	5	3	5	6	8	8	6	7	6	Indeterminate
85	ZM8YXDM	3	1	1	8	4	4	5	6	7	3	3	4	3	6	3	8	3	3	4	7	9	9	7	7	7	Indeterminate
86	ZM8YXDM	2	1	2	7	6	5	4	5	6	4	3	5	2	2	3	5	5	4	5	3	8	8	3	5	6	Indeterminate
87	ZM7JY3G	2	NA	NA	6	6	5	5	5	4	8	6	6	5	7	8	5	6	7	6	7	9	9	7	8	7	Low Activity
88	ZM7JY3G	3	1	1	3	NA	5	3	6	4	8	NA	5	3	6	4	3	3	7	7	4	8	8	6	7	7	Low Activity
89	ZM7JY3G	2	1	1	4	4	5	4	4	4	6	5	5	5	6	7	5	6	6	7	5	9	9	7	8	7	Low Activity
90	ZM7JY3G	2	1	1	6	6	6	5	5	4	7	3	6	6	6	7	4	6	7	7	3	6	8	6	6	6	Low Activity
91	ZM7JY3G	2	1	1	6	6	4	6	4	2	7	7	7	5	7	8	6	6	9	8	6	9	9	7	8	7	Low Activity
92	ZM7JY3G	2	NA	NA	3	3	3	4	3	6	7	5	4	2	6	8	4	5	7	7	4	8	8	6	7	6	Low Activity
93	ZM7JY3G	2	NA	NA	6	5	5	5	5	4	7	6	7	6	8	9	5	5	8	8	7	8	9	7	8	NA	Low Activity
94	ZM7JY3G	2	1	1	6	4	4	3	4	4	8	6	6	7	7	8	5	8	8	8	3	9	9	6	8	7	Low Activity
95	ZM7JY3G	3	1	1	4	6	5	5	4	7	6	6	7	5	7	8	8	7	8	7	6	9	8	6	8	NA	Low Activity
96	ZLZQMEV	2	NA	NA	7	7	4	8	6	5	7	6	7	5	7	8	5	7	4	7	6	9	8	7	8	7	Indeterminate
97	ZLZQMEV	NA	NA	NA	NA	NA	NA	NA	NA	NA	NA	NA	NA	NA	NA	NA	NA	NA	NA	NA	NA	NA	NA	NA	NA	NA	Indeterminate
98	ZLZQMEV	2	1	1	7	7	5	6	7	5	7	6	7	5	7	8	5	7	7	6	5	9	7	7	7	7	Indeterminate
99	ZLZNCLZ	2	1	1	7	7	5	7	6	7	7	8	8	4	8	9	3	6	8	8	7	9	9	7	8	7	Indeterminate
100	ZLZNCLZ	2	1	1	6	7	5	6	6	7	7	9	9	3	8	9	2	6	8	8	7	9	9	7	8	7	Indeterminate
101	ZLZNCLZ	2	1	1	6	7	5	6	6	7	6	8	9	4	8	9	3	6	8	8	7	9	9	7	8	7	Indeterminate
102	ZLZNCLZ	3	1	1	6	7	5	6	7	7	6	9	9	4	8	9	3	6	7	8	7	9	9	7	8	7	Indeterminate
103	ZLZNCLZ	3	1	1	6	6	5	6	6	7	6	8	9	4	8	9	3	6	6	8	7	9	9	7	8	7	Indeterminate
104	ZLZNCLZ	3	1	1	5	7	5	5	6	6	7	9	9	5	8	9	3	6	7	8	7	9	9	7	8	7	Indeterminate
105	ZLZNCLZ	3	1	1	9	7	5	6	7	7	6	9	9	3	8	9	2	6	9	8	7	9	9	7	8	7	Indeterminate
106	ZLZNCLZ	2	1	1	6	7	5	5	7	7	7	8	9	5	8	9	3	6	6	8	7	9	9	7	8	7	Indeterminate
107	ZLZNCLZ	3	1	1	9	6	5	5	7	7	5	9	9	3	8	9	2	5	8	8	7	9	9	7	8	7	Indeterminate
108	ZLZNCLZ	2	1	1	6	8	5	6	7	7	6	9	9	4	8	9	4	6	7	8	7	9	9	7	8	7	Indeterminate
109	ZLZNCLZ	3	1	1	9	6	6	7	6	7	6	9	9	3	8	9	2	6	9	8	7	9	9	7	8	7	Indeterminate
110	ZLZNCLZ	2	1	1	5	7	6	6	6	7	6	9	9	4	8	9	3	6	7	8	7	9	9	7	7	7	Indeterminate
111	ZLZNCLZ	3	1	1	9	7	6	7	6	7	7	9	9	4	8	9	3	5	9	8	7	9	9	7	8	7	Indeterminate
112	ZLZNCLZ	2	1	1	6	7	4	6	6	7	7	9	9	5	8	9	4	6	6	8	7	9	9	7	8	7	Indeterminate
113	ZLYEM2C	1	1	2	5	6	6	5	6	7	6	6	9	5	5	6	5	5	6	4	7	9	9	7	8	7	Indeterminate
114	ZLYEM2C	1	NA	1	5	5	5	4	5	7	7	8	9	5	5	6	6	6	7	6	7	9	9	7	8	7	Indeterminate
115	ZYU89T9	2	1	1	9	3	8	6	1	7	8	7	9	5	5	8	5	7	7	7	7	9	9	6	8	7	Indeterminate
116	ZYU89T9	1	1	1	8	3	3	4	1	7	8	6	9	5	5	6	5	8	8	8	7	9	8	7	8	7	Indeterminate
117	ZYU89T9	1	1	1	9	3	2	3	2	7	9	7	9	5	5	7	5	8	8	8	5	9	9	7	8	7	Indeterminate
118	ZYU89T9	1	1	1	9	3	4	3	1	7	9	7	7	5	5	6	6	8	9	8	7	9	9	7	8	7	Indeterminate
119	ZYLJ7R7	1	1	1	8	3	4	3	4	6	5	6	7	4	5	6	5	5	4	7	6	9	9	5	7	7	Low Activity
120	ZYLJ7R7	2	1	2	8	3	3	3	3	6	3	5	7	4	5	6	5	5	5	7	5	9	9	4	7	5	Low Activity
121	ZYLJ7R7	1	1	1	8	4	3	2	3	6	3	5	6	4	5	7	5	5	5	7	6	9	9	6	7	6	Low Activity
122	ZYLJ7R7	2	1	1	8	4	3	3	3	6	3	3	6	4	6	7	4	5	4	7	5	8	8	4	5	4	Low Activity
123	ZYLJ7R7	1	1	1	7	3	3	5	3	6	6	5	8	4	5	6	5	6	6	7	6	9	9	5	6	7	Low Activity
124	ZYLJ7R7	1	1	1	8	3	4	5	3	7	3	6	9	5	6	7	5	6	7	7	5	9	9	6	7	6	Low Activity
125	ZYHHR4Z	2	NA	NA	9	3	3	4	3	6	6	6	7	5	6	8	5	6	9	8	6	9	9	7	8	7	Indeterminate
126	ZYHHR4Z	2	1	1	9	2	2	4	3	6	7	6	9	4	7	8	4	6	9	8	7	9	9	7	8	7	Indeterminate
127	ZYHHR4Z	2	1	1	9	3	4	3	4	6	7	7	7	5	7	8	5	6	9	8	6	9	9	7	8	7	Indeterminate
128	ZYHHR4Z	2	1	1	9	4	3	5	4	6	7	6	9	4	7	8	4	5	9	8	7	9	9	7	8	7	Indeterminate
129	ZYHHR4Z	2	1	1	9	3	3	3	4	7	5	4	9	4	7	8	4	5	9	8	7	9	9	7	8	7	Indeterminate
130	ZYHHR4Z	2	1	1	9	3	4	4	4	6	7	6	9	4	7	8	4	6	9	8	7	9	9	7	8	7	Indeterminate
131	ZYHHR4Z	2	1	1	8	3	4	3	3	5	6	6	8	4	6	8	3	7	8	7	5	9	6	7	8	7	Indeterminate
132	ZYHHR4Z	1	1	1	9	3	3	3	4	7	8	4	8	3	7	8	6	6	9	8	7	9	9	7	8	7	Indeterminate
133	ZYHHR4Z	2	1	1	9	3	3	3	4	6	8	4	9	3	6	8	5	5	9	8	7	9	9	7	8	7	Indeterminate
134	ZYHHR4Z	1	1	1	9	4	4	3	3	6	8	5	6	4	7	8	4	6	9	8	7	9	9	7	8	7	Indeterminate
135	ZYHHR4Z	2	1	1	9	3	3	4	4	6	6	6	7	5	7	8	3	5	9	7	6	9	9	7	8	7	Indeterminate
136	ZY9XQJP	3	1	1	9	4	4	5	4	3	6	4	5	3	7	8	7	7	7	6	2	8	8	6	7	6	Indeterminate
137	ZY9XQJP	2	1	1	9	3	4	3	4	5	7	3	5	2	6	8	2	5	7	6	2	4	8	6	7	6	Indeterminate
138	ZY9XQJP	2	1	1	9	3	4	6	6	4	6	4	5	5	8	9	4	5	7	6	3	5	7	6	7	6	Indeterminate
139	ZY9XQJP	2	NA	NA	4	3	4	3	4	4	5	4	7	5	7	8	3	6	7	7	3	6	8	6	7	6	Indeterminate
140	ZY9XQJP	2	1	1	4	3	3	6	3	3	6	4	7	5	7	8	3	5	8	7	4	6	8	6	7	6	Indeterminate
141	ZY9XQJP	2	1	1	8	3	3	4	3	4	4	3	6	3	5	7	3	5	7	6	3	5	8	6	6	4	Indeterminate
142	ZY7IW45	1	1	1	9	NA	6	5	6	7	9	6	NA	5	8	9	3	NA	6	8	NA	NA	6	7	8	7	Indeterminate
143	ZY7IW45	NA	NA	NA	NA	NA	NA	NA	NA	NA	NA	NA	NA	NA	NA	NA	NA	NA	NA	NA	NA	NA	NA	NA	NA	NA	Indeterminate
144	ZY7IW45	1	1	1	9	4	4	7	6	7	9	3	NA	5	7	NA	3	8	8	NA	7	9	9	5	7	7	Indeterminate
145	ZY39SN0	2	NA	NA	9	3	5	8	4	7	6	6	9	3	8	9	5	8	7	6	7	9	9	7	8	7	High Activity
146	ZY39SN0	2	1	1	9	3	5	8	4	7	8	6	8	4	7	9	5	6	8	7	7	8	7	7	8	7	High Activity
147	ZY1ZKJY	2	1	1	6	3	4	3	3	6	7	7	8	6	7	7	4	4	6	7	7	8	9	6	7	7	Indeterminate
148	ZY1ZKJY	2	1	1	6	3	4	3	4	5	6	6	8	5	6	6	3	3	4	8	5	6	9	7	6	7	Indeterminate
149	ZY1ZKJY	2	1	2	4	2	4	3	2	5	6	6	7	5	6	7	3	3	4	5	5	4	9	6	7	6	Indeterminate
150	ZY1ZKJY	3	1	1	4	4	4	6	4	5	6	6	8	5	6	7	4	3	4	5	6	4	9	6	7	7	Indeterminate
151	ZXHCGKV	1	1	1	8	3	4	4	3	7	7	7	8	3	5	8	5	8	7	6	7	9	9	6	7	6	Low Activity
152	ZXHCGKV	1	1	1	9	2	3	5	3	7	6	7	8	4	6	9	4	7	8	6	5	9	9	7	7	7	Low Activity
153	ZXHCGKV	1	1	1	9	2	4	4	3	7	7	7	7	3	5	8	5	6	8	7	5	9	9	7	7	6	Low Activity
154	ZX52KVK	1	1	1	8	4	4	3	3	6	7	9	9	8	7	7	5	3	6	6	5	8	9	6	8	7	High Activity
155	ZX52KVK	1	1	1	8	5	4	3	3	6	6	9	9	8	7	7	6	4	4	7	4	9	8	5	7	7	High Activity
156	ZX52KVK	1	1	1	8	4	3	3	3	5	6	9	9	8	7	7	5	4	5	7	2	8	9	5	7	6	High Activity
157	ZX52KVK	2	1	1	8	5	3	3	4	6	7	9	9	8	7	7	5	4	5	7	5	9	9	6	7	7	High Activity
158	ZX52KVK	1	1	1	9	7	3	2	2	6	8	8	8	7	7	7	6	1	7	6	5	8	8	5	7	6	High Activity
159	ZX52KVK	1	1	1	9	4	4	3	3	5	6	9	9	8	8	7	4	4	5	8	6	9	5	7	8	7	High Activity
160	ZX52KVK	1	1	1	9	3	3	2	4	6	6	9	9	8	7	7	5	3	8	7	6	8	9	6	7	6	High Activity
161	ZX52KVK	1	1	1	9	NA	4	5	3	6	6	9	9	8	8	7	5	3	6	7	6	8	9	6	7	7	High Activity
162	ZWLGEWL	1	1	1	7	5	6	6	3	7	8	6	9	4	NA	5	6	5	6	8	5	6	9	6	6	7	Low Activity
163	ZWLGEWL	1	1	2	9	3	6	6	5	7	8	5	9	6	8	9	7	7	7	8	5	NA	7	4	6	7	Low Activity
164	ZWLGEWL	1	1	1	6	3	3	5	3	6	8	6	9	5	6	8	6	7	7	8	7	9	9	6	7	7	Low Activity
165	ZW61YGW	3	1	1	NA	2	3	5	5	5	5	7	7	5	7	8	8	5	5	8	7	4	5	4	6	7	Low Activity
166	ZW61YGW	2	1	1	9	2	3	3	3	5	5	6	7	5	6	7	8	5	7	8	5	7	7	5	7	5	Low Activity
167	ZW61YGW	1	2	2	NA	2	4	5	5	5	6	6	7	5	8	8	8	5	6	8	7	9	8	5	6	4	Low Activity
168	ZVNCGHM	1	1	1	9	6	5	6	3	7	9	6	6	3	7	8	2	6	9	8	7	9	8	7	8	7	Low Activity
169	ZVNCGHM	NA	NA	NA	NA	NA	NA	NA	NA	NA	NA	NA	NA	NA	NA	NA	NA	NA	NA	NA	NA	NA	NA	NA	NA	NA	Low Activity
170	ZVNCGHM	1	1	1	9	6	4	5	3	7	9	5	6	2	6	8	1	6	9	8	7	9	8	7	8	7	Low Activity
171	ZVNCGHM	1	1	1	9	7	6	6	3	7	9	6	6	4	7	8	2	3	7	8	7	9	9	7	8	7	Low Activity
172	ZVNCGHM	1	1	1	9	7	4	3	4	7	9	6	6	2	7	8	2	3	7	7	7	9	9	6	8	7	Low Activity
173	ZVNCGHM	1	1	1	9	5	4	5	3	7	9	4	4	3	6	8	2	7	9	8	7	9	8	6	8	7	Low Activity
174	ZVNCGHM	1	1	1	NA	5	4	NA	3	NA	NA	5	NA	5	7	8	2	7	NA	NA	NA	NA	8	NA	NA	NA	Low Activity
175	ZVNCGHM	1	1	1	9	7	3	5	1	7	9	5	6	4	7	8	3	7	8	8	7	9	8	7	8	7	Low Activity
176	ZVM4N7A	2	1	3	9	4	3	3	5	7	6	7	7	6	6	7	5	6	3	5	4	6	9	3	4	7	Low Activity
177	ZVM4N7A	1	1	1	9	4	4	5	4	6	8	7	7	6	6	6	5	4	5	6	6	7	8	6	7	7	Low Activity
178	ZVM4N7A	2	2	1	9	4	3	3	4	7	7	6	7	5	7	6	3	3	4	6	6	8	9	6	7	7	Low Activity
179	ZVM4N7A	2	1	2	9	3	4	5	5	5	6	6	6	5	6	6	4	4	4	5	6	8	8	5	5	5	Low Activity
180	ZVM4N7A	2	1	2	9	4	3	4	4	6	6	7	7	6	7	6	5	5	4	5	5	8	9	4	5	7	Low Activity
181	ZYXQKWY	2	1	1	9	6	5	5	6	6	6	5	7	4	8	9	6	6	7	6	7	9	5	7	8	7	Indeterminate
182	ZYXQKWY	1	1	1	8	3	4	3	6	7	6	4	6	3	8	9	5	6	7	4	7	9	3	7	8	7	Indeterminate
183	ZVBQY1N	2	1	1	8	3	5	4	5	6	6	3	3	4	7	8	2	4	7	7	4	6	NA	6	7	6	Low Activity
184	ZVBQY1N	3	1	1	8	3	5	5	4	5	6	4	4	5	8	8	5	6	8	7	4	7	9	6	7	6	Low Activity
185	ZVBQY1N	1	1	1	7	4	3	3	5	6	3	3	3	2	7	8	3	5	8	7	5	6	8	5	7	6	Low Activity
186	ZV14SIB	1	1	1	6	1	4	3	4	7	8	4	4	3	6	6	3	5	9	8	7	9	9	7	8	7	High Activity
187	ZV14SIB	2	1	1	6	5	5	5	6	7	8	6	6	5	6	7	4	5	9	8	7	9	9	7	8	7	High Activity
188	ZV14SIB	2	1	1	4	3	3	5	NA	7	9	6	9	5	NA	6	3	5	9	8	7	9	9	7	8	7	High Activity
189	ZUPAQVU	2	1	1	9	3	5	4	6	6	6	6	7	5	8	9	6	6	4	8	7	7	9	4	5	5	Indeterminate
190	ZUPAQVU	1	2	2	9	3	4	5	4	5	6	6	7	5	7	9	6	7	4	7	6	7	9	6	7	7	Indeterminate
191	ZUPAQVU	1	1	1	9	3	5	5	4	6	6	6	6	5	7	8	5	7	4	8	5	7	8	6	7	6	Indeterminate
192	ZUPAQVU	2	1	1	9	4	6	6	4	6	7	8	9	5	8	8	6	7	4	7	4	7	9	6	7	7	Indeterminate
193	ZUL3S6O	1	1	1	1	3	3	3	4	5	2	2	2	1	1	3	3	NA	3	3	6	4	8	6	6	6	Low Activity
194	ZUL3S6O	2	1	1	4	4	4	6	6	6	5	4	4	3	5	6	6	4	5	4	5	7	8	6	7	6	Low Activity
195	ZUG7QHE	3	1	2	7	5	5	6	6	6	6	7	9	4	5	6	7	7	4	6	7	9	9	5	2	7	Indeterminate
196	ZUG7QHE	2	1	2	8	4	4	6	4	5	6	6	8	5	5	6	7	6	4	6	6	9	9	5	3	7	Indeterminate
197	ZUG7QHE	2	NA	2	9	4	5	5	6	7	6	7	9	5	5	6	7	7	4	5	7	9	9	5	3	7	Indeterminate
198	ZUG7QHE	3	1	2	7	4	4	6	6	6	8	8	9	3	5	6	8	7	4	6	7	9	8	5	3	7	Indeterminate
199	ZUG7QHE	3	1	2	7	5	6	6	6	6	7	7	9	5	5	7	8	6	5	6	7	8	9	5	5	7	Indeterminate
200	ZUG7QHE	2	1	2	7	4	4	6	6	7	6	6	9	5	5	6	7	7	4	7	7	9	8	6	5	7	Indeterminate
201	ZUF48YS	2	1	1	7	3	4	7	4	5	5	6	8	5	6	6	6	NA	5	7	5	6	7	6	5	7	High Activity
202	ZUC2YGO	3	1	1	9	7	7	8	7	7	4	5	9	5	7	9	5	5	7	8	7	6	8	7	5	5	Indeterminate
203	ZUC2YGO	4	1	1	9	6	8	7	7	7	6	5	9	5	8	8	5	6	8	8	7	6	8	7	8	6	Indeterminate
204	ZTXY83G	1	1	1	6	4	6	5	7	4	7	6	6	6	6	8	5	6	3	8	2	9	4	7	8	7	Low Activity
205	ZTXY83G	2	1	1	7	7	6	5	7	5	6	6	7	6	6	7	5	6	6	7	5	6	7	5	5	5	Low Activity
206	ZTXY83G	1	1	1	6	6	6	5	6	6	7	6	6	5	5	8	6	7	6	8	6	8	9	6	7	6	Low Activity
207	ZTXY83G	1	1	1	6	6	6	6	7	5	6	6	6	5	6	7	4	7	6	8	4	6	6	6	7	5	Low Activity
208	ZTXWLP3	3	1	1	4	4	6	5	4	7	6	6	6	5	5	7	6	6	6	7	7	4	9	6	8	5	Low Activity
209	ZTXWLP3	3	1	1	4	4	6	5	4	7	7	6	7	5	5	6	6	6	6	8	7	4	9	7	8	7	Low Activity
210	ZTXWLP3	2	1	1	6	4	6	5	5	7	7	6	6	5	6	7	5	5	6	8	7	4	9	5	8	6	Low Activity
211	ZTMFN3O	1	1	1	9	7	6	6	5	6	7	3	NA	3	5	6	6	6	8	6	5	8	8	6	6	7	High Activity
212	ZTMFN3O	3	1	1	9	5	5	4	5	6	4	6	6	5	5	6	6	7	6	6	5	7	8	6	6	6	High Activity
213	ZTMFN3O	2	1	1	9	6	6	5	6	6	6	6	6	6	5	6	7	8	8	7	6	8	8	6	7	6	High Activity
214	ZTLUDS8	3	1	1	5	5	5	4	5	6	5	4	5	4	5	9	3	4	6	6	5	6	9	6	8	7	High Activity
215	ZTLUDS8	1	1	1	6	6	3	4	5	5	6	4	6	5	7	9	3	5	5	8	7	8	9	7	8	7	High Activity
216	ZTLUDS8	3	1	1	7	6	4	3	7	5	4	4	4	3	5	9	2	4	6	7	6	7	9	7	7	6	High Activity
217	ZTLIFAS	1	1	1	9	4	5	4	3	7	9	7	9	2	8	6	7	6	9	8	7	9	9	7	8	7	Indeterminate
218	ZTL5S2Y	3	1	1	6	3	5	5	4	7	9	7	NA	5	6	8	7	5	9	8	7	9	9	7	8	7	Indeterminate
219	ZTL5S2Y	3	1	1	6	4	4	6	4	6	6	8	6	5	6	7	5	5	4	6	5	8	9	6	7	6	Indeterminate
220	ZTL5S2Y	3	1	1	6	5	6	6	5	7	8	7	8	5	6	7	5	5	7	6	6	8	9	NA	7	7	Indeterminate
221	ZTL5S2Y	3	1	1	8	4	3	4	4	6	6	6	7	4	7	8	7	6	6	5	6	9	9	6	7	6	Indeterminate
222	ZTJ7L7Z	1	1	NA	9	8	7	8	4	7	4	4	9	3	7	8	3	8	9	8	7	9	9	7	8	7	Indeterminate
223	ZTJ7L7Z	3	1	1	4	5	4	3	4	7	4	4	9	3	7	8	2	3	9	8	6	9	9	7	8	7	Indeterminate
224	ZTJ7L7Z	1	1	1	8	7	4	3	NA	NA	4	4	9	3	8	9	3	5	9	8	7	9	9	7	8	7	Indeterminate
225	ZTJ7L7Z	1	1	1	9	8	7	8	3	7	6	4	9	3	8	9	2	8	9	8	7	9	9	7	8	7	Indeterminate
226	ZTJ7L7Z	1	1	1	9	7	6	8	3	7	3	4	9	2	7	9	2	2	9	8	7	9	9	7	8	7	Indeterminate
227	ZTJ7L7Z	1	1	1	8	7	6	8	3	7	4	6	9	3	6	7	3	7	9	8	7	9	9	7	8	7	Indeterminate
228	ZSUQ08V	3	4	1	6	8	8	7	7	4	6	8	8	7	6	8	7	7	4	6	2	8	9	6	6	4	Indeterminate
229	ZSUQ08V	2	5	1	1	1	1	1	1	1	1	1	1	1	1	1	1	1	4	1	2	1	1	1	1	1	Indeterminate
230	ZSQNUZ5	1	1	1	6	3	4	5	4	6	6	3	7	5	8	8	3	5	4	7	5	6	8	7	7	7	High Activity
231	ZSQNUZ5	2	1	2	5	3	3	5	3	6	6	6	6	4	8	8	3	5	4	5	5	6	8	6	6	7	High Activity
232	ZSQNUZ5	1	1	1	6	3	7	6	2	6	6	4	7	6	8	9	3	5	4	6	6	6	9	6	6	7	High Activity
233	ZSQNUZ5	1	1	1	6	3	5	5	4	6	7	6	6	5	8	9	3	4	5	5	5	7	9	7	7	7	High Activity
234	ZSQNUZ5	2	1	1	6	4	4	5	3	6	6	6	4	5	7	8	3	4	4	5	6	6	9	7	6	7	High Activity
235	ZSQNUZ5	1	1	1	6	4	6	6	6	6	6	6	6	5	7	8	3	5	4	7	5	8	9	7	7	7	High Activity
236	ZS78KHV	1	1	1	8	4	6	5	3	7	7	6	7	6	6	7	5	6	7	6	5	8	7	5	5	5	Indeterminate
237	ZS2DMX7	2	1	1	8	5	4	5	6	5	6	7	7	6	6	7	5	5	6	6	5	9	9	5	6	6	Indeterminate
238	ZS2DMX7	1	1	1	8	6	3	5	6	6	6	7	8	6	6	7	5	5	6	7	5	9	9	4	6	7	Indeterminate
239	ZR3WH7V	1	1	2	9	4	5	5	4	6	8	4	9	3	7	8	5	6	5	8	4	7	9	4	6	6	Low Activity
240	ZR3WH7V	2	NA	1	9	4	7	6	4	7	8	5	8	5	7	8	4	NA	NA	8	7	6	9	5	8	7	Low Activity
241	ZR3WH7V	1	1	1	9	4	7	6	4	7	7	4	9	3	6	8	3	5	7	7	6	9	9	6	8	7	Low Activity
242	ZQFL1P3	NA	NA	NA	8	3	6	7	4	6	7	9	9	7	7	8	5	6	7	6	4	8	9	6	8	6	Low Activity
243	ZQFL1P3	2	1	1	4	3	7	8	6	5	7	9	9	6	7	8	5	7	8	5	4	3	9	6	8	6	Low Activity
244	ZPEL6L3	2	3	1	4	5	4	4	6	6	4	9	9	8	8	9	4	3	4	8	4	8	9	6	5	5	Low Activity
245	ZPEL6L3	1	3	1	8	7	5	5	6	6	4	9	9	7	8	9	5	4	4	7	5	9	9	5	7	4	Low Activity
246	ZPDABJR	1	2	2	9	6	5	4	6	5	6	6	6	5	5	6	5	5	7	7	5	7	5	5	7	4	Indeterminate
247	ZPDABJR	2	1	1	8	6	5	4	6	6	4	5	5	6	7	7	3	5	7	7	6	8	4	6	7	6	Indeterminate
248	ZLTUJTN	1	1	NA	5	8	5	4	6	6	5	5	5	5	7	8	4	5	4	7	6	5	3	6	7	6	Low Activity
249	ZLTUJTN	1	1	1	5	6	5	6	5	7	5	5	6	6	8	9	NA	6	7	8	6	7	7	NA	NA	NA	Low Activity
250	ZLTUJTN	2	1	1	6	4	4	5	4	6	6	5	3	5	8	9	4	5	5	4	7	8	8	6	7	6	Low Activity
251	ZLTUJTN	1	1	3	5	2	5	6	6	6	6	5	5	5	8	9	5	5	6	5	7	8	6	6	8	7	Low Activity
252	ZLTUJTN	1	1	1	4	5	5	5	5	6	5	5	5	5	8	9	4	5	5	3	6	6	4	6	7	6	Low Activity
253	ZLTUJTN	1	1	1	5	7	4	5	6	5	5	5	3	5	8	9	4	4	6	5	6	5	5	7	7	6	Low Activity
254	ZLTUJTN	NA	NA	NA	9	4	4	6	6	6	4	6	6	5	8	9	5	7	8	5	6	8	8	7	8	6	Low Activity
255	ZLTUJTN	3	1	NA	5	7	5	5	8	7	6	6	6	6	8	9	4	6	6	5	6	7	6	7	7	7	Low Activity
256	ZLTUJTN	1	1	1	5	7	3	7	5	6	4	3	3	3	8	9	4	4	5	5	5	7	3	5	6	5	Low Activity
257	ZLTUJTN	2	1	1	5	9	5	8	8	6	5	5	5	5	8	9	4	4	7	7	NA	8	7	7	7	6	Low Activity
258	ZLPZS0H	3	2	1	6	4	4	3	3	7	4	4	4	3	3	9	7	5	6	5	4	8	8	6	5	4	Low Activity
259	ZLPZS0H	3	3	1	7	3	3	2	6	5	6	6	6	5	5	6	6	6	7	5	4	6	7	5	6	4	Low Activity
260	ZLPZS0H	2	2	1	4	4	4	3	4	5	4	4	4	3	6	7	8	3	7	5	4	6	6	7	6	4	Low Activity
261	ZLGD9M0	3	1	1	4	7	7	6	5	7	9	5	3	6	7	8	3	8	9	8	7	9	9	7	8	7	High Activity
262	ZLGD9M0	3	1	1	4	6	9	8	8	6	9	4	4	7	7	8	3	7	4	8	6	9	9	7	7	7	High Activity
263	ZLGD9M0	4	1	1	4	6	8	7	8	7	8	7	4	6	7	9	3	7	8	8	6	9	9	7	6	7	High Activity
264	ZLGD9M0	4	1	1	4	3	8	7	8	7	9	9	4	6	8	9	3	8	9	8	7	9	9	7	8	7	High Activity
265	ZLGD9M0	3	1	1	4	4	9	8	7	7	9	8	3	7	8	9	3	8	8	8	7	9	9	7	8	7	High Activity
266	ZLGD9M0	NA	NA	NA	NA	NA	NA	NA	NA	NA	NA	NA	NA	NA	NA	NA	NA	NA	NA	NA	NA	NA	NA	NA	NA	NA	High Activity
267	ZLGD9M0	3	1	1	4	4	7	6	4	7	8	5	4	5	8	8	3	5	5	8	7	9	9	7	8	7	High Activity
268	ZLGD9M0	4	1	1	4	6	8	7	5	6	8	5	4	7	7	8	3	7	6	8	6	9	9	7	7	7	High Activity
269	ZL9BTWF	2	1	1	6	5	5	5	6	6	8	6	7	5	8	6	6	6	8	7	5	5	9	7	8	7	Low Activity
270	ZL9BTWF	3	NA	NA	5	5	6	5	5	3	6	8	9	5	7	6	6	4	8	6	6	6	5	7	7	7	Low Activity
271	ZL9BTWF	2	NA	NA	4	4	6	7	6	4	7	7	8	5	7	6	6	5	8	7	5	9	5	7	8	7	Low Activity
272	ZL9BTWF	3	1	NA	5	4	5	5	6	4	7	6	7	5	8	7	5	5	9	6	4	9	9	6	7	7	Low Activity
273	ZL9BTWF	3	1	1	6	4	5	7	6	3	8	7	8	5	7	6	6	6	7	6	4	9	4	7	8	7	Low Activity
274	ZL9BTWF	3	1	1	5	6	6	6	6	4	7	6	8	5	8	7	5	5	7	6	4	9	5	7	8	7	Low Activity
275	ZL9BTWF	3	1	1	6	6	6	6	5	4	7	6	6	5	7	7	5	7	8	6	5	6	9	7	8	7	Low Activity
276	ZL9BTWF	2	1	1	5	6	6	6	6	4	7	7	8	5	7	6	7	6	9	7	5	7	6	7	8	7	Low Activity
277	ZL9BTWF	2	1	1	5	4	5	5	6	4	7	7	8	5	7	6	6	7	9	7	5	8	5	7	8	7	Low Activity
278	ZL9BTWF	3	1	1	5	4	4	6	5	4	6	7	8	5	7	6	5	5	7	6	6	4	4	6	7	6	Low Activity
279	ZL9BTWF	2	1	1	4	4	6	7	5	2	7	7	8	5	7	7	5	5	8	7	6	9	5	7	8	7	Low Activity
280	ZL9BTWF	2	1	1	4	4	6	5	5	3	6	7	9	5	7	6	5	5	8	6	5	5	6	6	8	7	Low Activity
281	ZL63I8R	3	1	1	6	6	5	5	6	4	5	5	6	5	7	9	5	5	9	5	4	8	5	7	7	6	Low Activity
282	ZL63I8R	2	1	1	6	6	NA	8	6	5	6	6	9	5	8	9	5	8	6	7	7	9	6	7	8	7	Low Activity
283	ZL63I8R	1	1	1	6	6	6	8	9	6	6	5	6	5	7	9	5	8	6	6	7	9	6	7	8	7	Low Activity
284	ZL63I8R	1	1	1	2	6	6	8	6	4	6	6	6	5	8	9	5	8	6	5	7	9	6	7	8	7	Low Activity
285	ZL63I8R	2	1	1	4	6	6	5	7	4	6	6	6	5	7	8	5	6	6	6	4	7	7	6	7	6	Low Activity
286	ZL63I8R	2	NA	NA	6	7	6	5	6	4	6	6	NA	5	NA	NA	NA	NA	NA	NA	NA	NA	NA	NA	NA	NA	Low Activity
287	ZL63I8R	2	1	1	4	6	5	8	6	4	5	6	7	5	7	8	5	8	7	5	5	9	6	7	8	7	Low Activity
288	ZKVR426	2	1	1	4	3	4	3	4	6	4	4	4	3	7	7	3	3	6	7	6	8	2	4	5	4	Low Activity
289	ZKVR426	2	1	1	4	2	4	3	4	4	4	4	4	5	7	8	4	3	6	8	2	9	2	5	6	5	Low Activity
290	ZKVR426	2	1	1	4	3	4	3	4	5	4	6	6	5	7	7	4	5	6	8	6	9	2	6	7	6	Low Activity
291	ZKVR426	1	1	1	4	3	4	3	4	6	4	5	4	5	7	8	4	4	6	7	6	8	2	5	6	5	Low Activity
292	ZKVR426	2	1	1	4	3	4	3	4	6	3	4	4	3	6	7	3	3	5	8	6	9	2	5	6	6	Low Activity
293	ZKVR426	2	2	2	5	3	5	4	5	6	6	6	6	5	6	7	4	4	5	8	6	9	2	4	5	4	Low Activity
294	ZKFV71L	2	1	1	4	3	4	5	4	5	4	7	5	4	8	6	6	5	5	8	4	9	9	5	7	7	High Activity
295	ZKFV71L	1	1	3	5	3	4	4	5	5	5	7	7	5	8	8	3	7	7	7	5	9	9	4	7	7	High Activity
296	ZKFV71L	1	1	2	5	3	4	3	4	6	6	6	9	5	6	7	5	6	7	7	6	8	9	4	7	6	High Activity
297	ZKFV71L	1	1	2	4	3	4	3	4	5	4	7	8	5	7	8	5	7	6	7	5	9	9	6	8	7	High Activity
298	ZKFV71L	1	1	1	6	3	4	6	5	6	5	6	8	4	7	7	5	5	6	8	6	9	9	5	6	7	High Activity
299	ZKFV71L	1	1	2	5	4	5	6	5	6	5	8	8	5	7	7	6	7	6	8	7	9	9	5	6	7	High Activity
300	ZKFV71L	1	1	1	5	3	4	6	4	6	6	7	8	5	7	6	6	5	6	7	6	8	9	6	7	7	High Activity
301	ZK4CK8Y	2	1	1	9	4	6	6	3	7	7	4	6	5	7	8	8	7	8	8	7	9	NA	6	8	7	Low Activity
302	ZK4CK8Y	1	1	1	9	NA	3	7	3	7	9	6	5	5	6	6	2	8	9	8	7	9	9	7	8	7	Low Activity
303	ZK4CK8Y	2	1	1	9	2	6	6	4	6	8	7	7	4	6	7	5	6	8	8	7	9	9	7	8	7	Low Activity
304	ZK112BX	2	1	1	6	6	5	5	6	4	5	6	7	5	7	8	5	5	6	7	4	6	7	5	6	6	Indeterminate
305	ZK112BX	1	1	1	6	6	4	3	NA	4	5	6	7	5	7	8	3	4	5	7	4	7	7	6	7	5	Indeterminate
306	ZK112BX	1	1	2	4	4	4	5	6	5	6	6	7	5	7	8	5	6	7	8	5	7	7	5	6	5	Indeterminate
307	ZK112BX	2	1	1	6	5	5	5	5	4	5	5	8	4	8	8	4	5	6	7	4	7	8	4	6	7	Indeterminate
308	ZK112BX	2	1	1	6	6	4	6	7	4	5	6	6	5	7	8	4	6	6	7	4	8	7	5	6	4	Indeterminate
309	ZK112BX	1	2	1	6	6	3	5	5	4	8	5	8	5	7	8	5	5	5	7	4	6	6	4	7	6	Indeterminate
310	ZK112BX	2	1	1	7	5	3	4	4	6	4	6	7	4	8	8	4	5	5	7	4	6	8	5	7	7	Indeterminate
311	ZK112BX	1	1	1	6	5	6	5	6	4	6	6	7	5	8	8	4	5	6	7	4	6	7	5	6	7	Indeterminate
312	ZK112BX	2	1	1	9	3	4	5	5	4	6	6	7	4	8	8	5	5	5	7	3	3	4	4	7	4	Indeterminate
313	ZK112BX	2	2	1	6	5	5	5	6	2	4	4	7	5	7	8	4	5	4	7	2	6	6	4	6	6	Indeterminate
314	ZK112BX	1	1	1	5	3	4	6	3	4	6	6	8	6	7	8	5	5	6	7	4	6	7	5	6	5	Indeterminate
315	ZK112BX	2	1	2	4	6	3	4	5	6	5	7	8	5	7	8	5	5	5	6	4	6	7	4	7	5	Indeterminate
316	ZK112BX	1	1	1	6	6	3	5	4	4	5	6	8	5	7	8	5	5	6	7	4	6	7	5	6	6	Indeterminate
